# Supplementary material for: Functional and genomic characterization of three novel cell lines derived from a metastatic gallbladder cancer tumor
Source: PubMed Central journal article supplement (PMC7158131; doi:10.1186/s40659-020-00282-7), 2020-04-15

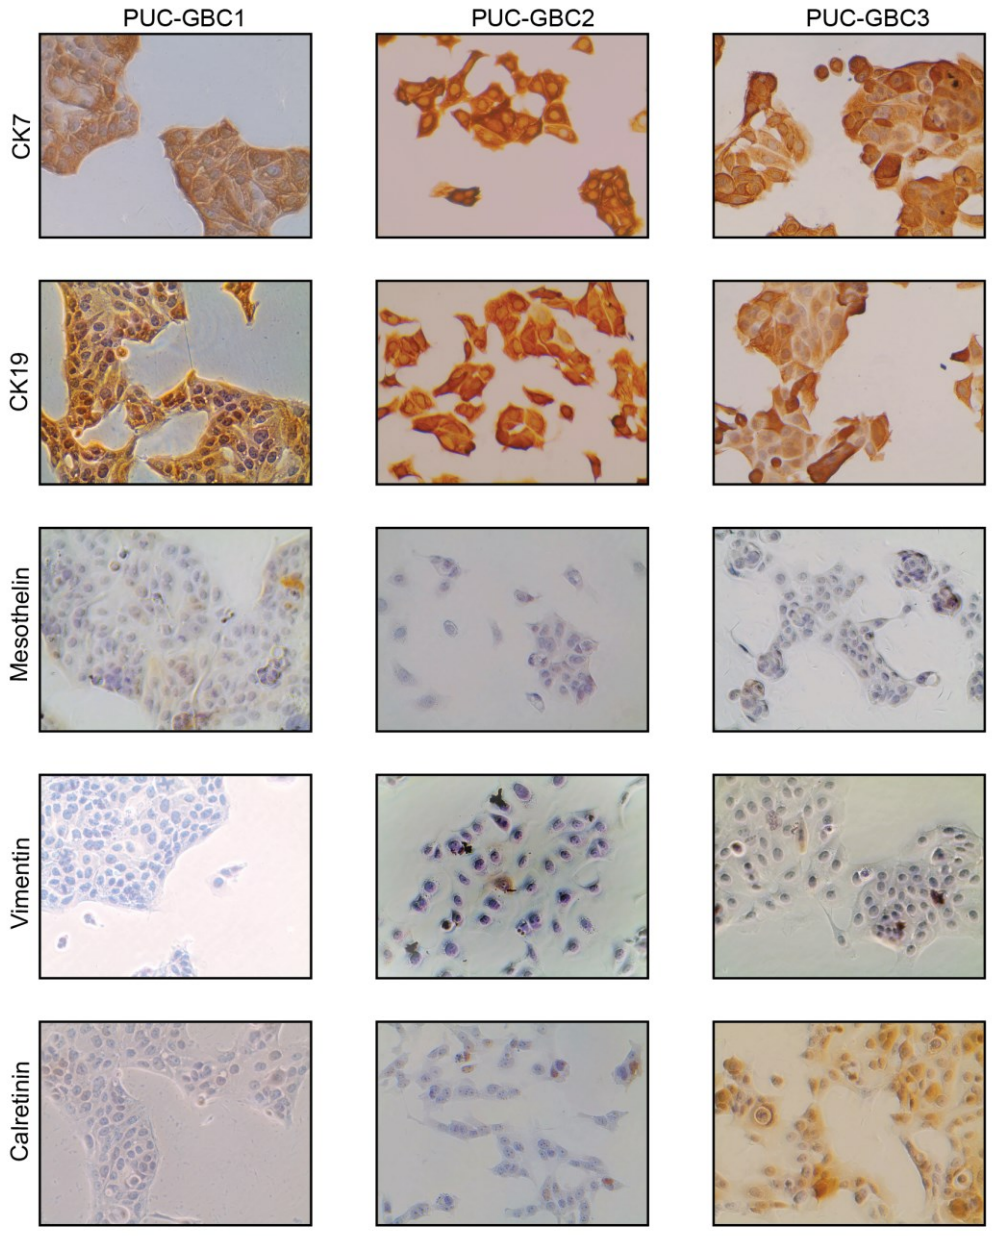

Supplement: 40659_2020_282_MOESM1_ESM.pdf [file 40659_2020_282_MOESM1_ESM.pdf]
